# Supplementary material
Source: Springer Nature journal article supplement (https://www.springermedizin.de/resource/supplementary/12888_2010_785_MOESM4_ESM.pdf/9478740)

## ROC Curve

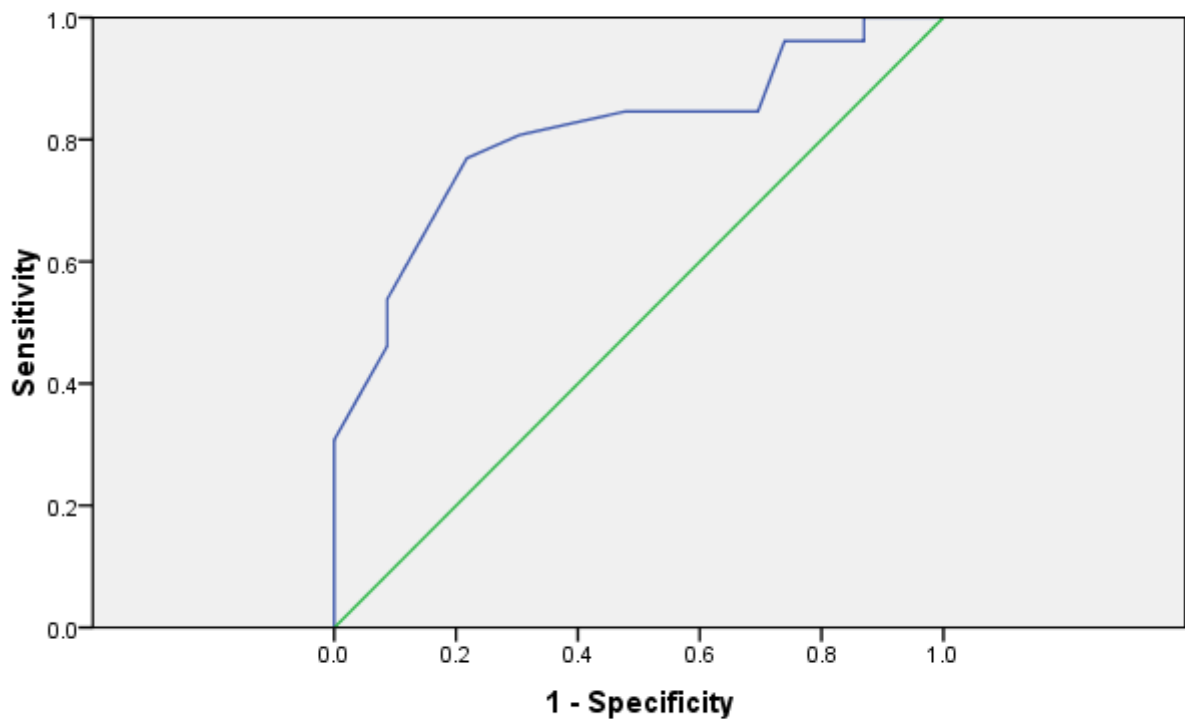

Diagonal segments are produced by ties.

Supplement: MOESM4 [file 9478740]
